# Supplementary material for: Observation of phase-retention behavior of the HC(NH2)2PbI3 black perovskite polymorph upon mesoporous TiO2 scaffolds
Source: Royal Society of Chemistry journal article supplement (doi:10.1039/c6cc02086k), 2016-01-01
Supplement: c6cc02086k1.pdf [file c6cc02086k1.pdf]

### Electronic Supplementary Information

#### **Observation of phase-retention behavior of $\text{HC}(\text{NH}_2)_2\text{PbI}_3$ black perovskite polymorph upon mesoporous oxide scaffolds**

Yuanyuan Zhou <sup>a,\*</sup>, Joonsuh Kwun <sup>a</sup>, Hector. F. Garces <sup>a</sup>, Shuping Pang <sup>b,\*</sup>, Nitin P. Padture<sup>a,\*</sup>

<sup>a</sup> School of Engineering, Brown University, Providence, RI 02912, USA  
[yuanyuan\\_zhou@brown.edu](mailto:yuanyuan_zhou@brown.edu) (Y.Z.), [nitin\\_padture@brown.edu](mailto:nitin_padture@brown.edu) (N.P.P.)

<sup>b</sup> Qingdao Institute of Bioenergy and Bioprocess Technology, Chinese Academy of Sciences, Qingdao 266101, P.R. China  
[pangsp@qibet.ac.cn](mailto:pangsp@qibet.ac.cn) (S.P.)

---

#### **Experimental Procedure**

*Film Fabrication.* The deposition of phase-pure  $\alpha\text{-HC}(\text{NH}_2)_2\text{PbI}_3$  perovskite layers follows the method reported elsewhere.<sup>S1</sup> For the deposition of  $\text{PbI}_2$  thin films, a 40 wt%  $\text{PbI}_2$  DMF solution was spin-coated on the substrates. In the case of compact  $\text{TiO}_2$ -coated FTO substrate, the spin-coating condition used was 3000 rpm for 40 s. In the case of mesoporous  $\text{TiO}_2$  scaffold (250 nm thick) coated FTO substrate, the spin-coating condition used was 6000 rpm for 40 s. A similar procedure was followed for mesoporous  $\text{Al}_2\text{O}_3$  scaffold (~250 nm thickness). Subsequently, the as-formed  $\text{PbI}_2$  thin films were aged at room temperature for 2 h or treated at 100 °C for 10 s for the purpose of their facile conversion to  $\alpha\text{-HC}(\text{NH}_2)_2\text{PbI}_3$  perovskite in the following processes. After deposition of  $\text{PbI}_2$  thin films, fresh  $\text{HC}(\text{NH}_2)_2\text{I}$  solution of 20 mg.mL<sup>-1</sup> in anhydrous isopropanol was spin-coated onto the as-prepared  $\text{PbI}_2$  thin films, and then annealed at 170 °C for 1 min, which constitutes the first spincoating/annealing (SCA) cycle. This SCA cycle was then repeated three times. The excess MAI was washed using isopropyl alcohol, and the final thin films were annealed at 170 °C for 15 min to obtain a dark-colored  $\alpha\text{-HC}(\text{NH}_2)_2\text{PbI}_3$  perovskite film.

*Materials Characterization.* The morphologies of the films were observed in a scanning electron microscope (SEM; LEO 1530VP, Carl Zeiss, Germany). Conductive c-AFM images (MFP-3D Origin, Oxford Instruments) were collected in open air using an electrically-conductive diamond-coated tip in contact mode. A current map of the perovskite film was captured using 256 scan lines and 256 scan points with a scan rate of 0.5 Hz. X-ray diffraction (XRD) was performed on a X-ray diffractometer (D8 Discover, Bruker AXS, Karlsruhe, Germany) using  $\text{Cu K}\alpha_1$  radiation ( $\lambda=1.5406 \text{ \AA}$ ) at step size/time 0.02°/10 s. Grazing Incident X-ray Diffraction (GIXRD) data were collected from the surface of the perovskite film at an incident angle of  $\omega=0.7^\circ$  using a high resolution X-ray diffraction diffractometer (D8 Discover, Bruker AXS, Karlsruhe, Germany) equipped with a Göbel mirror and a Ge022ACC monochromator ( $\text{Cu K}\alpha_1$  radiation).

## Supplementary Figures

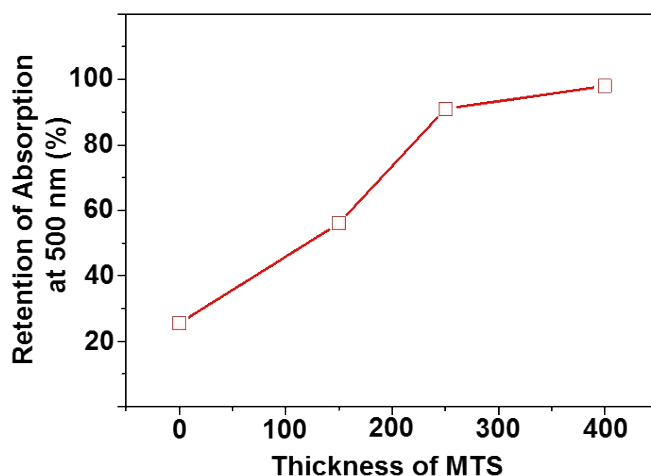

**Figure S1.** The retention of absorption at 500 nm of the FAPbI<sub>3</sub> thin film as a function of the thickness of the mesoporous TiO<sub>2</sub> scaffold (MTS). The total perovskite thickness is constant at ~400 nm. Use of 150-nm, 250-nm, and 400-nm MTS are expected to add 17 m<sup>2</sup>, 29 m<sup>2</sup>, and 26 m<sup>2</sup> per m<sup>2</sup> area, respectively, to the substrate.

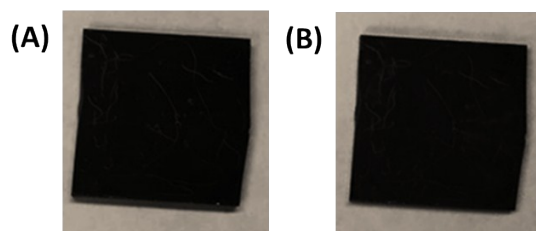

**Figure S2.** An  $\alpha$ -FAPbI<sub>3</sub> perovskite thin film deposited on a ~250-nm mesoporous Al<sub>2</sub>O<sub>3</sub> scaffold (A) before and (B) after 24-h exposure to the ambient.

## References

[S1] Y. Zhou, M. Yang, J. Kwun, O. S. Games, Y. Zhao, S. Pang, N. P. Padture and K. Zhu, *Nanoscale*, 2016 , 8, 6265-6270.
